# Supplementary material for: Multi-Omics Analysis Reveals Novel Subtypes and Driver Genes in Glioblastoma
Source: Front Genet. 2020 Nov 26;11:565341. doi: 10.3389/fgene.2020.565341 (PMC7726196; doi:10.3389/fgene.2020.565341)
Supplement: Supplementary file 1 [file Table_1.XLSX]

## Sheet: Sup table 1
Samples	Sex	OS	A22_histological_type	A23_Tumor_tissue_site	A2_Event	A8_New_Event	A8_New_Event_Time	A8_New_Event_Tissue	A8_New_Event_Type	A9_Cancer_Status	age_at_initial_pathologic_diagnosis	mutation
TCGA-28-5209	FEMALE	442	Untreated primary (de novo) GBM	Brain	Alive	0	442	NA		Not Available	66	173
TCGA-27-1835	FEMALE	648	Untreated primary (de novo) GBM	Brain	Dead	1	157	NA	Progression of Disease	WITH TUMOR	53	124
TCGA-26-5139	FEMALE	48	Untreated primary (de novo) GBM	Brain	Alive	0	48	NA		WITH TUMOR	65	59
TCGA-76-4929	FEMALE	111	Untreated primary (de novo) GBM	Brain	Dead	0	111	NA		WITH TUMOR	76	99
TCGA-14-0790	FEMALE	419	Untreated primary (de novo) GBM	Brain	Dead	0	419	NA		WITH TUMOR	64	3419
TCGA-06-2563	FEMALE	932	Untreated primary (de novo) GBM	Brain	Alive	1	554	NA		WITH TUMOR	72	129
TCGA-06-2569	FEMALE	13	Untreated primary (de novo) GBM	Brain	Alive	0	13	NA		WITH TUMOR	24	148
TCGA-06-0125	FEMALE	1448	Untreated primary (de novo) GBM	Brain	Dead	1	797	NA	Progression of Disease	WITH TUMOR	63	108
TCGA-06-5412	FEMALE	138	Untreated primary (de novo) GBM	Brain	Dead	1	88	NA	Progression of Disease	WITH TUMOR	78	119
TCGA-06-2561	FEMALE	537	Untreated primary (de novo) GBM	Brain	Dead	1	78	NA	Recurrence	WITH TUMOR	53	4163
TCGA-06-5410	FEMALE	108	Untreated primary (de novo) GBM	Brain	Dead	0	108	NA		WITH TUMOR	72	52
TCGA-06-2570	FEMALE	958	Untreated primary (de novo) GBM	Brain	Alive	0	958	NA		WITH TUMOR	21	199
TCGA-41-5651	FEMALE	460	Untreated primary (de novo) GBM	Brain	Dead	1	210	NA	Progression of Disease	WITH TUMOR	59	126
TCGA-32-2616	FEMALE	224	Untreated primary (de novo) GBM	Brain	Dead	1	182	NA	Progression of Disease	WITH TUMOR	48	1920
TCGA-12-3653	FEMALE	442	Untreated primary (de novo) GBM	Brain	Dead	1	224	NA	Progression of Disease	WITH TUMOR	34	1983
TCGA-14-1823	FEMALE	543	Untreated primary (de novo) GBM	Brain	Dead	1	140	NA	Recurrence	WITH TUMOR	58	1100
TCGA-28-2513	FEMALE	222	Untreated primary (de novo) GBM	Brain	Alive	1	75	NA	Progression of Disease	WITH TUMOR	69	180
TCGA-02-0055	FEMALE	76	Untreated primary (de novo) GBM	Brain	Dead	1	6	NA	Progression of Disease	WITH TUMOR	62	109
TCGA-32-1982	FEMALE	142	Untreated primary (de novo) GBM	Brain	Dead	0	142	NA		WITH TUMOR	76	4387
TCGA-12-5299	FEMALE	98	Untreated primary (de novo) GBM	Brain	Dead	0	98	NA		WITH TUMOR	56	44
TCGA-14-1034	FEMALE	485	Untreated primary (de novo) GBM	Brain	Dead	1	282	NA	Progression of Disease	WITH TUMOR	60	105
TCGA-14-0817	FEMALE	164	Untreated primary (de novo) GBM	Brain	Dead	0	164	NA		Not Available	69	7140
TCGA-06-1804	FEMALE	414	Untreated primary (de novo) GBM	Brain	Dead	0	414	NA		WITH TUMOR	81	86
TCGA-27-2526	FEMALE	87	Untreated primary (de novo) GBM	Brain	Dead	0	87	NA		WITH TUMOR	79	3476
TCGA-14-0871	FEMALE	880	Untreated primary (de novo) GBM	Brain	Dead	0	880	NA		Not Available	74	8767
TCGA-06-5418	FEMALE	83	Untreated primary (de novo) GBM	Brain	Dead	0	83	NA		WITH TUMOR	75	107
TCGA-76-4931	FEMALE	279	Untreated primary (de novo) GBM	Brain	Dead	1	112	NA	Progression of Disease	WITH TUMOR	70	66
TCGA-06-2558	FEMALE	380	Untreated primary (de novo) GBM	Brain	Dead	0	380	NA		Not Available	75	159
TCGA-06-0210	FEMALE	225	Untreated primary (de novo) GBM	Brain	Dead	1	67	NA	Progression of Disease	WITH TUMOR	72	119
TCGA-19-2619	FEMALE	294	Untreated primary (de novo) GBM	Brain	Alive	1	146	NA	Progression of Disease	WITH TUMOR	55	1125
TCGA-41-4097	FEMALE	6	Untreated primary (de novo) GBM	Brain	Dead	0	6	NA		WITH TUMOR	63	100
TCGA-06-5416	FEMALE	204	Untreated primary (de novo) GBM	Brain	Alive	0	204	NA		WITH TUMOR	23	17355
TCGA-26-5135	FEMALE	270	Untreated primary (de novo) GBM	Brain	Dead	0	270	NA		Not Available	72	101
TCGA-32-4213	FEMALE	604	Untreated primary (de novo) GBM	Brain	Alive	1	353	NA	Recurrence	WITH TUMOR	47	140
TCGA-06-5408	FEMALE	357	Untreated primary (de novo) GBM	Brain	Dead	1	158	NA	Progression of Disease	WITH TUMOR	54	57
TCGA-28-5215	FEMALE	335	Untreated primary (de novo) GBM	Brain	Dead	1	164	NA	Progression of Disease	WITH TUMOR	62	61
TCGA-16-1045	FEMALE	883	Untreated primary (de novo) GBM	Brain	Dead	1	654	NA	Recurrence	WITH TUMOR	49	3329
TCGA-27-1832	FEMALE	300	Untreated primary (de novo) GBM	Brain	Dead	1	176	NA	Progression of Disease	WITH TUMOR	59	1608
TCGA-19-2625	FEMALE	124	Untreated primary (de novo) GBM	Brain	Dead	0	124	NA		TUMOR FREE	76	2799
TCGA-12-5295	FEMALE	454	Untreated primary (de novo) GBM	Brain	Dead	1	399	NA	Progression of Disease	WITH TUMOR	60	123
TCGA-19-1390	FEMALE	772	Untreated primary (de novo) GBM	Brain	Dead	0	772	NA		Not Available	63	3166
TCGA-28-2509	FEMALE	145	Untreated primary (de novo) GBM	Brain	Alive	0	145	NA		Not Available	77	2741
TCGA-14-2554	FEMALE	532	Untreated primary (de novo) GBM	Brain	Dead	1	NA	NA	Locoregional Disease	WITH TUMOR	52	117
TCGA-06-5858	FEMALE	187	Untreated primary (de novo) GBM	Brain	Alive	1	97	NA	Progression of Disease	WITH TUMOR	45	222
TCGA-06-0211	MALE	360	Untreated primary (de novo) GBM	Brain	Dead	1	53	NA	Progression of Disease	WITH TUMOR	47	104
TCGA-27-2519	MALE	550	Untreated primary (de novo) GBM	Brain	Dead	1	256	NA	Progression of Disease	WITH TUMOR	48	3230
TCGA-06-0141	MALE	313	Untreated primary (de novo) GBM	Brain	Dead	1	145	NA	Progression of Disease	WITH TUMOR	62	52
TCGA-14-0787	MALE	68	Untreated primary (de novo) GBM	Brain	Dead	0	68	NA		Not Available	69	8500
TCGA-26-5132	MALE	286	Untreated primary (de novo) GBM	Brain	Alive	0	286	NA		TUMOR FREE	74	88
TCGA-19-5960	MALE	455	Untreated primary (de novo) GBM	Brain	Dead	1	382	NA	Recurrence	TUMOR FREE	56	96
TCGA-06-2559	MALE	150	Untreated primary (de novo) GBM	Brain	Dead	0	150	NA		WITH TUMOR	83	188
TCGA-27-1831	MALE	505	Untreated primary (de novo) GBM	Brain	Dead	1	144	NA	Progression of Disease	WITH TUMOR	66	168
TCGA-06-2562	MALE	382	Untreated primary (de novo) GBM	Brain	Dead	1	151	NA	Progression of Disease	WITH TUMOR	81	179
TCGA-02-0047	MALE	448	Untreated primary (de novo) GBM	Brain	Dead	1	57	NA	Progression of Disease	WITH TUMOR	78	131
TCGA-06-5411	MALE	254	Untreated primary (de novo) GBM	Brain	Dead	1	214	NA	Progression of Disease	WITH TUMOR	51	62
TCGA-12-3650	MALE	333	Untreated primary (de novo) GBM	Brain	Dead	1	239	NA	Progression of Disease	WITH TUMOR	46	121
TCGA-41-3915	MALE	184	Untreated primary (de novo) GBM	Brain	Alive	1	288	NA	Locoregional Disease	WITH TUMOR	48	76
TCGA-32-2615	MALE	485	Untreated primary (de novo) GBM	Brain	Dead	1	131	NA	Progression of Disease	WITH TUMOR	62	161
TCGA-06-2565	MALE	506	Untreated primary (de novo) GBM	Brain	Dead	1	178	NA	Recurrence	WITH TUMOR	59	107
TCGA-06-0878	MALE	218	Untreated primary (de novo) GBM	Brain	Alive	1	66	NA	Recurrence	WITH TUMOR	74	6699
TCGA-32-1980	MALE	36	Untreated primary (de novo) GBM	Brain	Dead	0	36	NA		WITH TUMOR	72	23
TCGA-06-0139	MALE	362	Untreated primary (de novo) GBM	Brain	Dead	1	152	NA	Progression of Disease	WITH TUMOR	40	7
TCGA-28-5204	MALE	454	Untreated primary (de novo) GBM	Brain	Dead	0	454	NA		WITH TUMOR	72	77
TCGA-27-1830	MALE	154	Untreated primary (de novo) GBM	Brain	Dead	1	124	NA	Recurrence	WITH TUMOR	57	229
TCGA-28-5208	MALE	544	Untreated primary (de novo) GBM	Brain	Dead	1	148	NA	Progression of Disease	WITH TUMOR	52	106
TCGA-06-5414	MALE	273	Untreated primary (de novo) GBM	Brain	Alive	1	167	NA	Progression of Disease	WITH TUMOR	61	70
TCGA-26-1442	MALE	953	Untreated primary (de novo) GBM	Brain	Alive	0	953	NA		WITH TUMOR	43	64
TCGA-19-2629	MALE	737	Untreated primary (de novo) GBM	Brain	Dead	1	145	NA	Progression of Disease	WITH TUMOR	60	2712
TCGA-32-2634	MALE	693	Untreated primary (de novo) GBM	Brain	Alive	0	693	NA		TUMOR FREE	82	1120
TCGA-27-2523	MALE	489	Untreated primary (de novo) GBM	Brain	Dead	1	402	NA	Progression of Disease	WITH TUMOR	63	3305
TCGA-41-2572	MALE	406	Untreated primary (de novo) GBM	Brain	Dead	1	122	NA	Progression of Disease	WITH TUMOR	67	98
TCGA-27-2524	MALE	231	Untreated primary (de novo) GBM	Brain	Dead	0	231	NA		WITH TUMOR	56	3090
TCGA-16-0846	MALE	119	Untreated primary (de novo) GBM	Brain	Dead	0	119	NA		WITH TUMOR	85	6319
TCGA-19-1787	MALE	385	Untreated primary (de novo) GBM	Brain	Dead	1	308	NA	Recurrence	WITH TUMOR	48	3091
TCGA-06-2564	MALE	181	Untreated primary (de novo) GBM	Brain	Alive	0	181	NA		WITH TUMOR	50	80
TCGA-06-0130	MALE	394	Untreated primary (de novo) GBM	Brain	Dead	1	244	NA	Progression of Disease	WITH TUMOR	54	44
TCGA-32-1970	MALE	468	Untreated primary (de novo) GBM	Brain	Dead	1	408	NA	Progression of Disease	WITH TUMOR	59	3968
TCGA-12-0821	MALE	323	Untreated primary (de novo) GBM	Brain	Dead	1	259	NA	Recurrence	WITH TUMOR	62	7742
TCGA-26-5133	MALE	452	Untreated primary (de novo) GBM	Brain	Alive	1	370	NA	Progression of Disease	TUMOR FREE	59	99
TCGA-06-0882	MALE	632	Untreated primary (de novo) GBM	Brain	Dead	1	213	NA	Recurrence	WITH TUMOR	30	143
TCGA-76-4925	MALE	146	Untreated primary (de novo) GBM	Brain	Dead	1	88	NA	Progression of Disease	Not Available	76	125
TCGA-02-2483	MALE	466	Untreated primary (de novo) GBM	Brain	Alive	0	466	NA		WITH TUMOR	43	183
TCGA-28-5220	MALE	388	Untreated primary (de novo) GBM	Brain	Dead	1	262	NA	Progression of Disease	WITH TUMOR	67	68
TCGA-19-4065	MALE	214	Untreated primary (de novo) GBM	Brain	Alive	1	70	NA	Recurrence	WITH TUMOR	36	94
TCGA-12-3652	MALE	1062	Untreated primary (de novo) GBM	Brain	Dead	1	203	NA	Progression of Disease	WITH TUMOR	60	178
TCGA-26-5134	MALE	167	Untreated primary (de novo) GBM	Brain	Alive	0	167	NA		TUMOR FREE	74	89
TCGA-28-5216	MALE	415	Untreated primary (de novo) GBM	Brain	Alive	0	415	NA		TUMOR FREE	52	54
TCGA-19-2624	MALE	5	Untreated primary (de novo) GBM	Brain	Dead	0	5	NA		TUMOR FREE	51	834
TCGA-02-2485	MALE	470	Untreated primary (de novo) GBM	Brain	Alive	1	186	NA	Progression of Disease	WITH TUMOR	53	201
TCGA-32-2632	MALE	269	Untreated primary (de novo) GBM	Brain	Dead	0	269	NA		Not Available	80	222
TCGA-27-1834	MALE	1233	Untreated primary (de novo) GBM	Brain	Dead	1	335	NA	Recurrence	WITH TUMOR	56	226
TCGA-14-1829	MALE	218	Untreated primary (de novo) GBM	Brain	Alive	0	218	NA		WITH TUMOR	57	190
TCGA-27-2528	MALE	480	Untreated primary (de novo) GBM	Brain	Dead	1	72	NA	Progression of Disease	WITH TUMOR	62	139
TCGA-06-5413	MALE	268	Untreated primary (de novo) GBM	Brain	Alive	1	195	NA	Progression of Disease	WITH TUMOR	67	79
TCGA-06-2567	MALE	133	Untreated primary (de novo) GBM	Brain	Dead	0	133	NA		WITH TUMOR	65	4493
TCGA-32-2638	MALE	766	Untreated primary (de novo) GBM	Brain	Dead	0	766	NA		TUMOR FREE	67	1760
TCGA-15-1444	MALE	1537	Glioblastoma Multiforme (GBM)	Brain	Dead	1	1550	NA	Progression of Disease	WITH TUMOR	21	65
TCGA-06-2557	MALE	33	Untreated primary (de novo) GBM	Brain	Dead	0	33	NA		WITH TUMOR	76	82
TCGA-32-5222	MALE	585	Untreated primary (de novo) GBM	Brain	Dead	1	118	NA	Progression of Disease	WITH TUMOR	66	104
TCGA-19-2620	MALE	148	Untreated primary (de novo) GBM	Brain	Dead	0	148	NA		TUMOR FREE	70	3300
TCGA-06-5859	MALE	139	Untreated primary (de novo) GBM	Brain	Alive	0	139	NA		WITH TUMOR	63	77
TCGA-27-1837	MALE	427	Untreated primary (de novo) GBM	Brain	Dead	1	136	NA	Progression of Disease	WITH TUMOR	36	150
TCGA-14-1825	MALE	232	Untreated primary (de novo) GBM	Brain	Dead	1	82	NA	Progression of Disease	WITH TUMOR	70	192
TCGA-28-5213	MALE	298	Untreated primary (de novo) GBM	Brain	Alive	0	298	NA		WITH TUMOR	72	71
TCGA-06-5856	MALE	114	Untreated primary (de novo) GBM	Brain	Dead	0	114	NA		WITH TUMOR	58	88
TCGA-28-1747	MALE	77	Untreated primary (de novo) GBM	Brain	Dead	0	77	NA		Not Available	44	3637
TCGA-06-0129	MALE	1024	Untreated primary (de novo) GBM	Brain	Dead	1	148	NA	Progression of Disease	WITH TUMOR	30	124
TCGA-06-0190	MALE	317	Untreated primary (de novo) GBM	Brain	Dead	1	88	NA	Progression of Disease	WITH TUMOR	62	99
TCGA-27-2521	MALE	510	Untreated primary (de novo) GBM	Brain	Dead	0	510	NA		WITH TUMOR	34	181
TCGA-28-1753	MALE	37	Untreated primary (de novo) GBM	Brain	Alive	0	37	NA		WITH TUMOR	53	5495
TCGA-28-5207	MALE	343	Untreated primary (de novo) GBM	Brain	Dead	0	343	NA		WITH TUMOR	71	81
TCGA-14-0789	MALE	342	Untreated primary (de novo) GBM	Brain	Dead	1	105	NA	Progression of Disease	Not Available	54	6644
TCGA-28-5218	MALE	157	Untreated primary (de novo) GBM	Brain	Dead	0	157	NA		Not Available	63	55
TCGA-02-2486	MALE	618	Untreated primary (de novo) GBM	Brain	Dead	0	618	NA		WITH TUMOR	64	133
TCGA-28-2514	MALE	160	Untreated primary (de novo) GBM	Brain	Alive	0	160	NA		Not Available	45	103
TCGA-41-2571	MALE	26	Untreated primary (de novo) GBM	Brain	Dead	1	26	NA	Progression of Disease	WITH TUMOR	89	159
TCGA-06-0131	MALE	278	Untreated primary (de novo) GBM	Brain	Dead	1	123	NA	Progression of Disease	WITH TUMOR	62	52
